# Supplementary material
Source: PubMed Central journal article supplement (PMC4392909)

A

Enriched motif

TGATAACG

Best Match

*PQM-1* L3 ChIP-seq  
(*modENCODE*)

Motif

AACTGATAACG

--TGATAA::

PQM-1

ACTGATAAGA

B

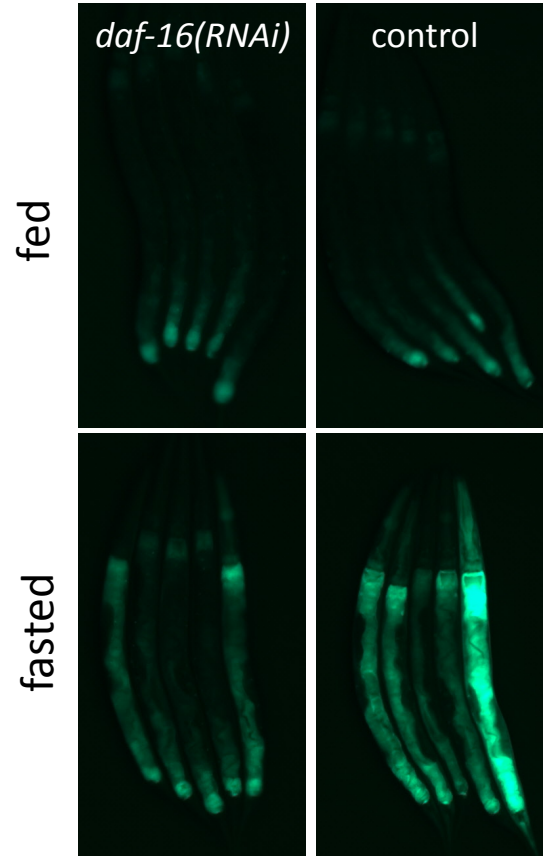

C

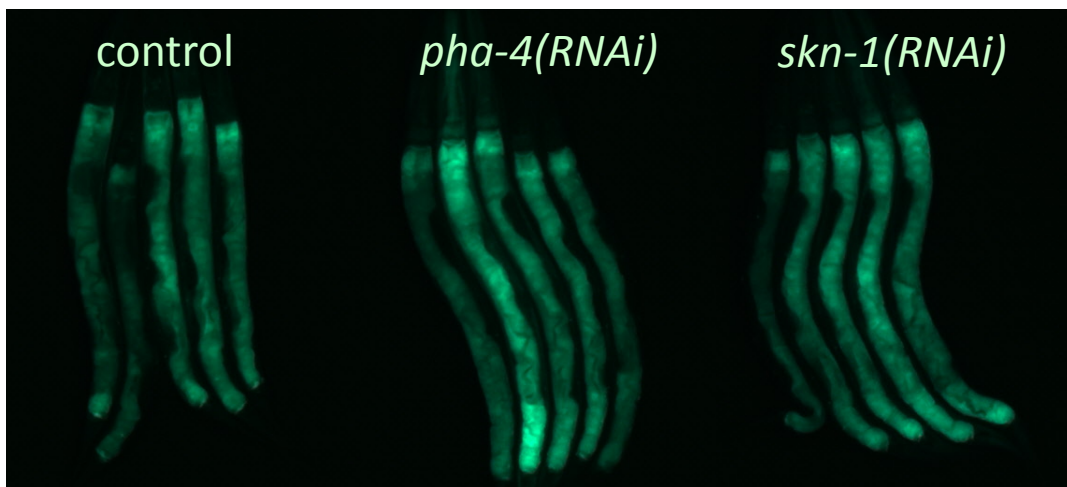

Supplement: NIHMS665117-supplement-5.pdf [file NIHMS665117-supplement-5.pdf]
