# Supplementary material
Source: PubMed Central journal article supplement (PMC4392909)

A

|                               |   |   |   |   |
|-------------------------------|---|---|---|---|
| CRTC-1 <sup>S76A, S179A</sup> | - | + | - | + |
| CA- AAK-2                     | - | - | + | + |

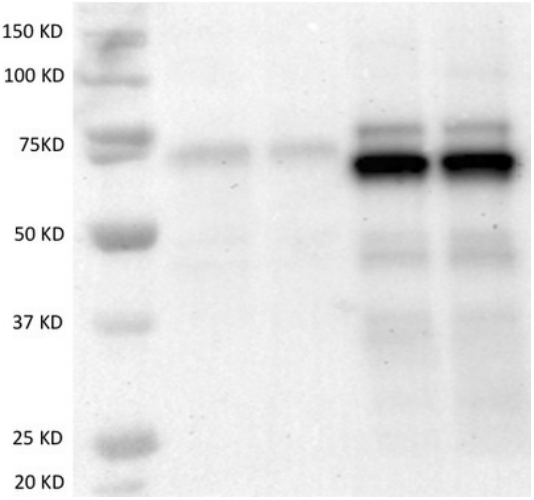

B

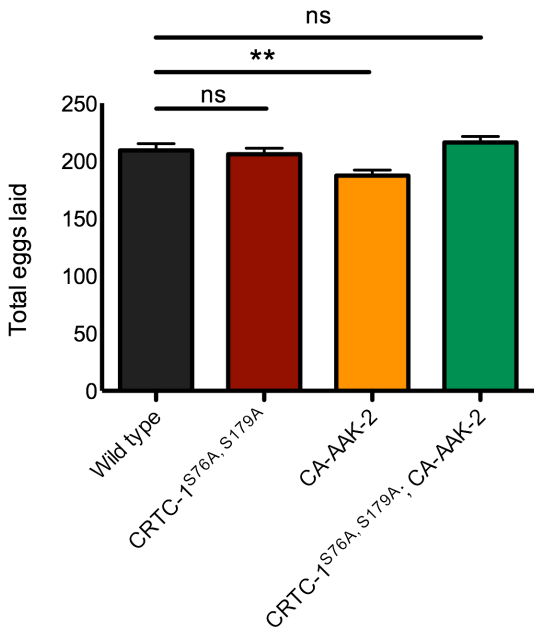

Supplement: NIHMS665117-supplement-1.pdf [file NIHMS665117-supplement-1.pdf]

**A**

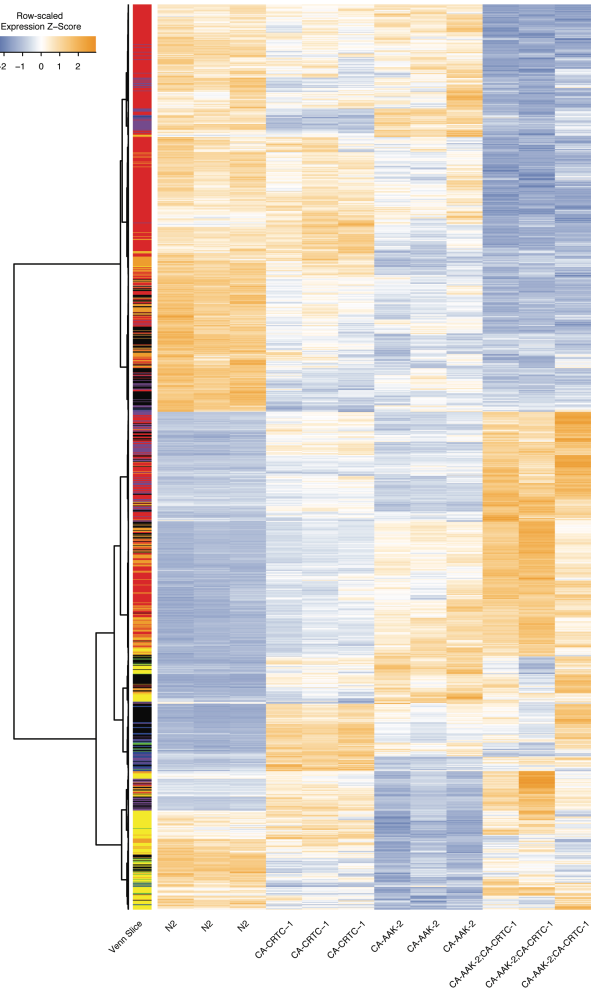

**B**

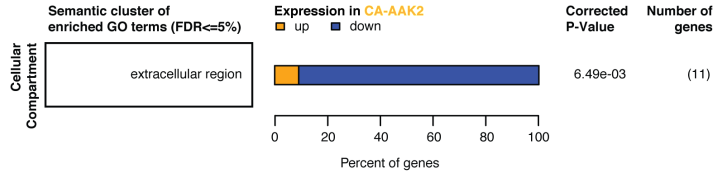

**C**

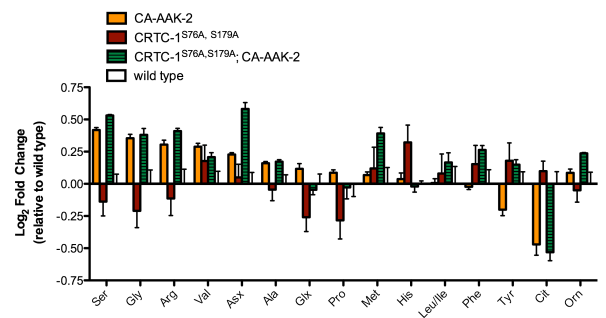

**D**

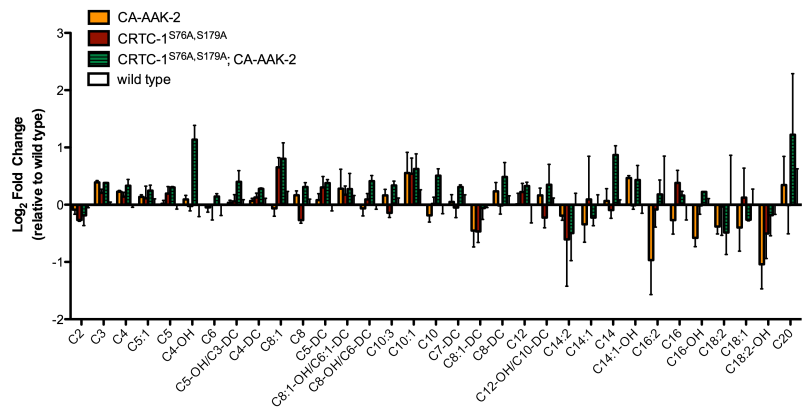

Supplement: NIHMS665117-supplement-2.pdf [file NIHMS665117-supplement-2.pdf]

control

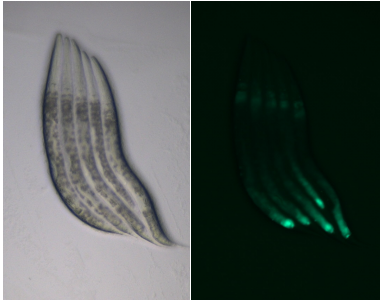

*tax-6(RNAi)*

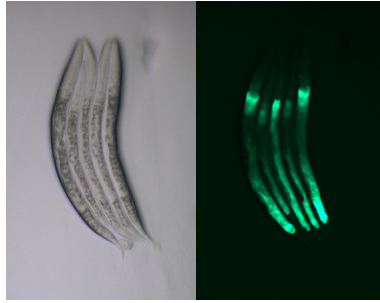

Supplement: NIHMS665117-supplement-3.pdf [file NIHMS665117-supplement-3.pdf]

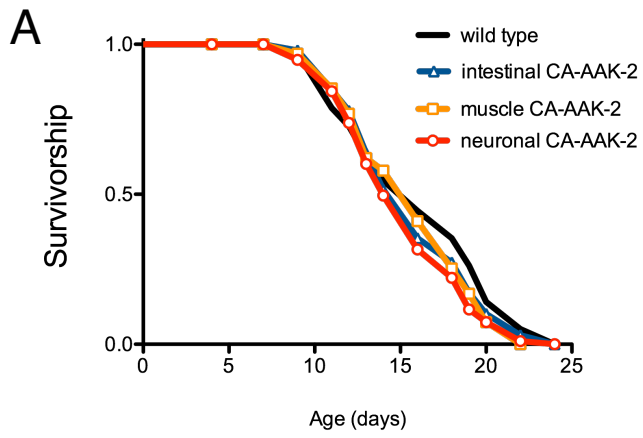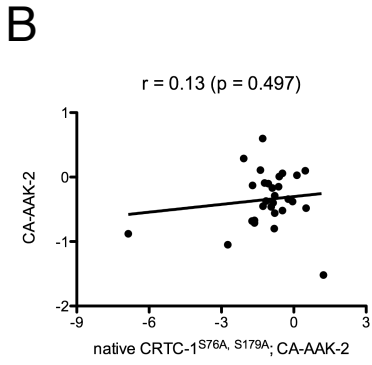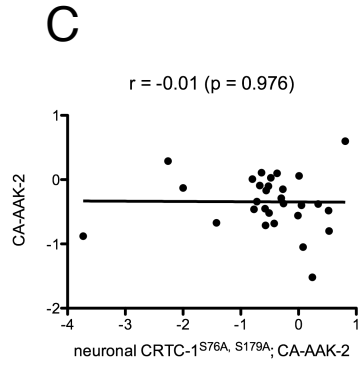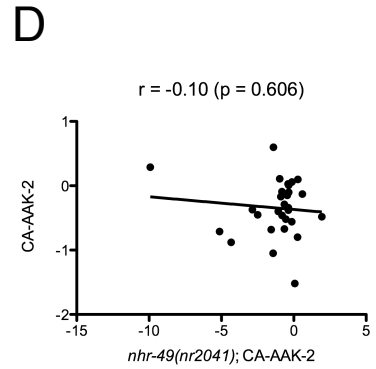

Supplement: NIHMS665117-supplement-4.pdf [file NIHMS665117-supplement-4.pdf]

**A***nhr-49(nr2041)* + intestinal NHR-49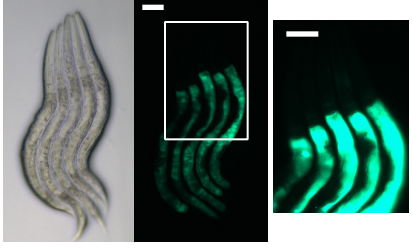**B**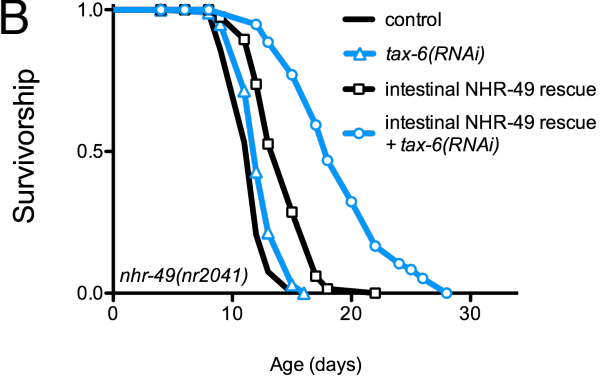**C**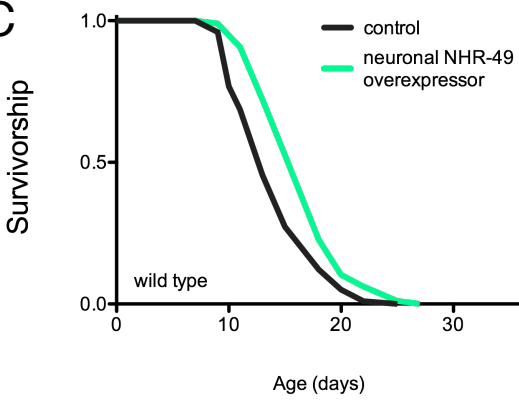**D**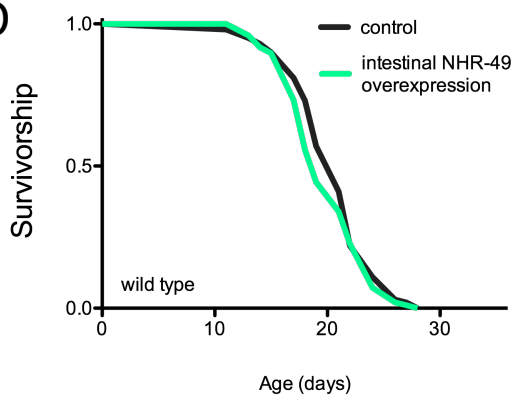

Supplement: NIHMS665117-supplement-6.pdf [file NIHMS665117-supplement-6.pdf]

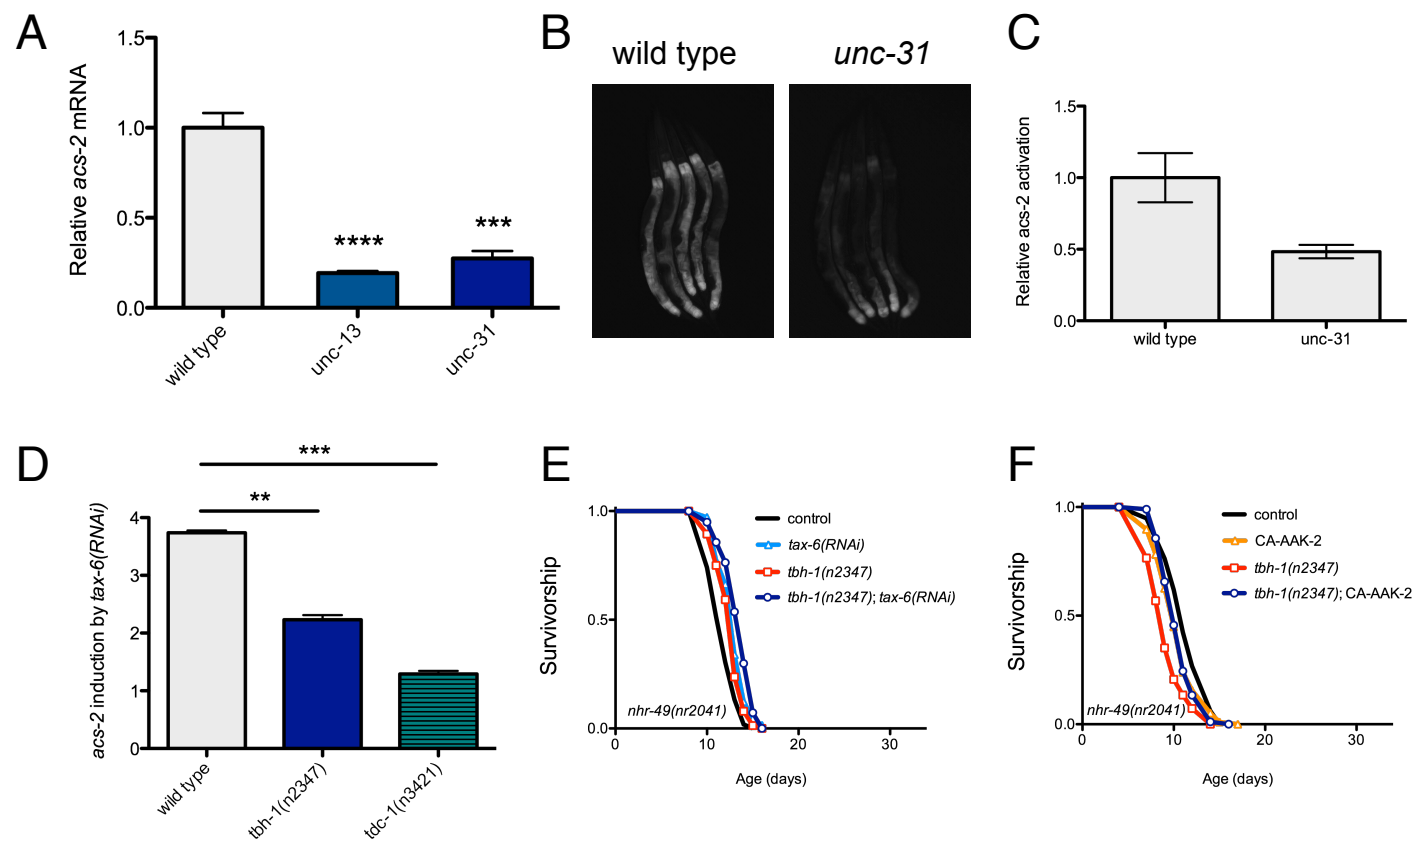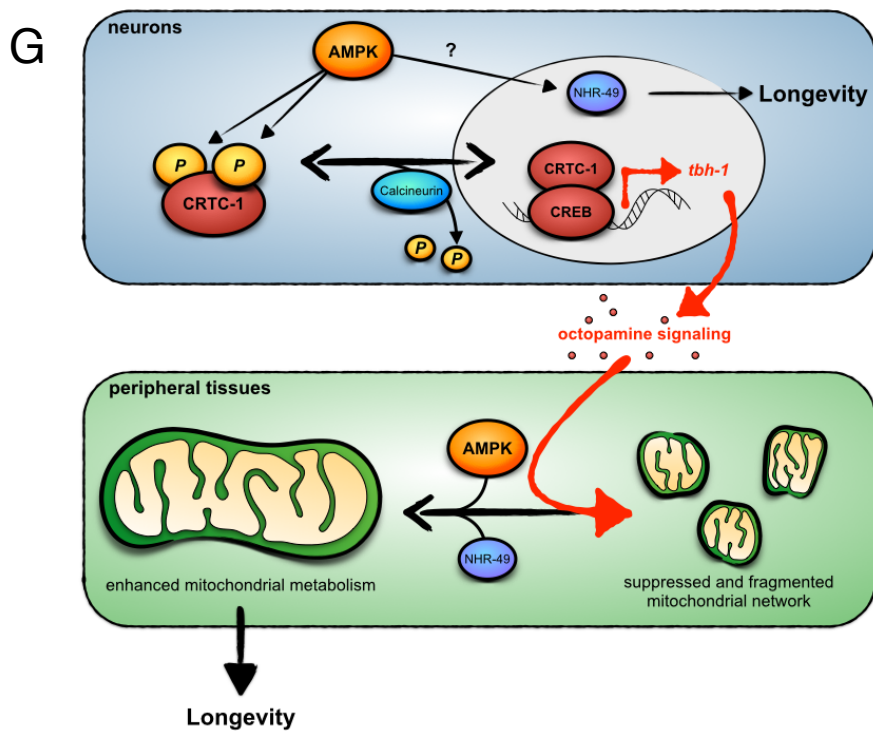

Supplement: NIHMS665117-supplement-7.pdf [file NIHMS665117-supplement-7.pdf]
